# Supplementary material for: ARF-GEF cytohesin-2/ARNO regulates R-Ras and α5-integrin recycling through an EHD1-positive compartment
Source: PubMed Central journal article supplement — Mol Biol Cell. 2015 Nov 15;26(23):4265–79. doi: 10.1091/mbc.E15-05-0278 (PMC4642859; doi:10.1091/mbc.e15-05-0278), 2015-11-15
Supplement: supp_E15-05-0278v1_CombinedSupMats.pdf [file supp_E15-05-0278v1_CombinedSupMats.pdf]

# Supplemental Materials

*Molecular Biology of the Cell*

Salem et al.

| Supplemental Table 1: Pearson's Correlation Coefficients |                        |                        |
|----------------------------------------------------------|------------------------|------------------------|
|                                                          | 0%<br>Saponin          | 0.02%<br>Saponin       |
| WT-ARNO/EHD1                                             | 0.72<br>(n = 40 cells) | 0.74<br>(n = 64 cells) |
| E156K-ARNO/<br>EHD1                                      | 0.67<br>(n = 75 cells) | 0.80<br>(n = 50 cells) |

**Supplemental Table 1: Pearson's Correlation coefficients for cytohesin-2/ARNO and EHD1.** Cerulean-EHD1 channels were masked, and co-localization with cytohesin-2/ARNO (WT or E156K) were measured for cells treated with 0% and 0.02% saponin permeabilization buffer. Co-localization was quantified using 2 independent experiments with the following number of cells: (0% saponin EHD1/WT-ARNO; n = 40 cells, 0% saponin EHD1/E156K-ARNO; n = 75 cells; 0.02% saponin EHD1/WT-ARNO; n = 64 cells, 0.02% saponin EHD1/E156K-ARNO; n = 50 cells).

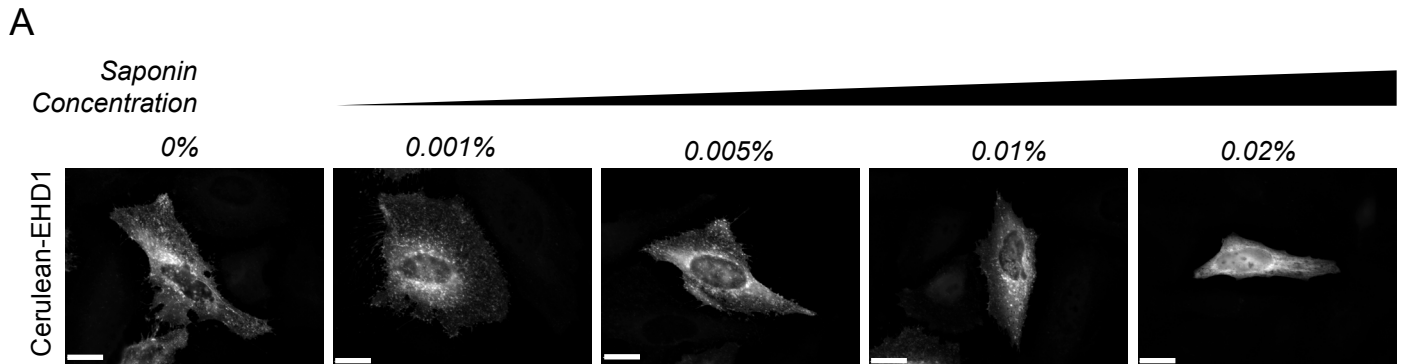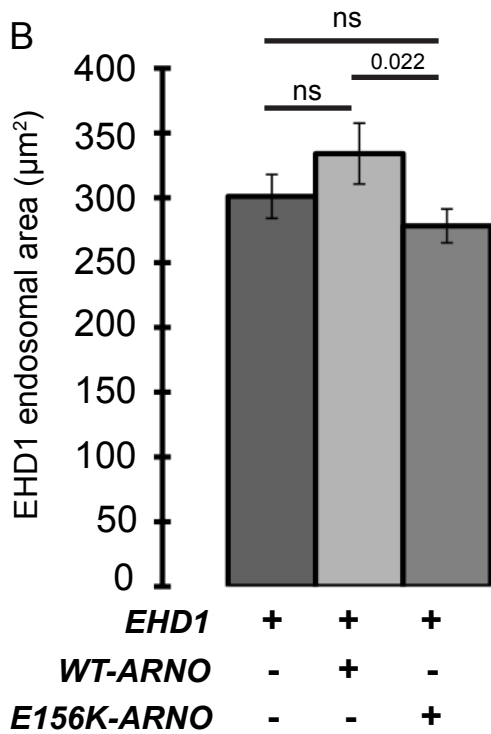

**Supplemental Figure 1: Saponin treatment does not promote EHD1 tubule formation.** A) HeLa cells expressing Cerulean-EHD1 were treated with saponin permeabilization buffer from 0% - 0.02% saponin. Cells were imaged using wide field microscopy, and deconvolved using Slidebook 6.0 imaging software. Images were taken over the course of 3 independent experiments. B) A 2D-Laplacian filter was applied to EHD1 channels and subsequently masked to highlight EHD1-positive structures. Raw endosomal area for 0% saponin-treated cells (Figure 1 A-C) was extracted using Slidebook 6.0 software. Samples were analyzed from 2 independent experiments using a 2-sample t-test using MiniTab 17. ns = not significant.

| Supplemental Table 2: Pearson's Correlation Coefficients |                                       |                                       |
|----------------------------------------------------------|---------------------------------------|---------------------------------------|
| Cerulean-EHD1<br>mcherry WT<br>R-Ras                     | Cerulean-EHD1<br>mcherry 38V<br>R-Ras | Cerulean-EHD1<br>mcherry 43N<br>R-Ras |
| 0.51<br>(n = 60 cells)                                   | 0.54<br>(n = 65 cells)                | 0.56<br>(n = 51 cells)                |

**Supplemental Table 2: Wild-type and mutant R-Ras (38V and 43N) share similar co-localization values.** Images were deconvolved and R-Ras channels were masked. Pearson's Correlation was determined using Slidebook 6.0 software. (38V R-Ras; n = 65 cells, 43N R-Ras; n = 51 cells, WT R-Ras, n = 60 cells).



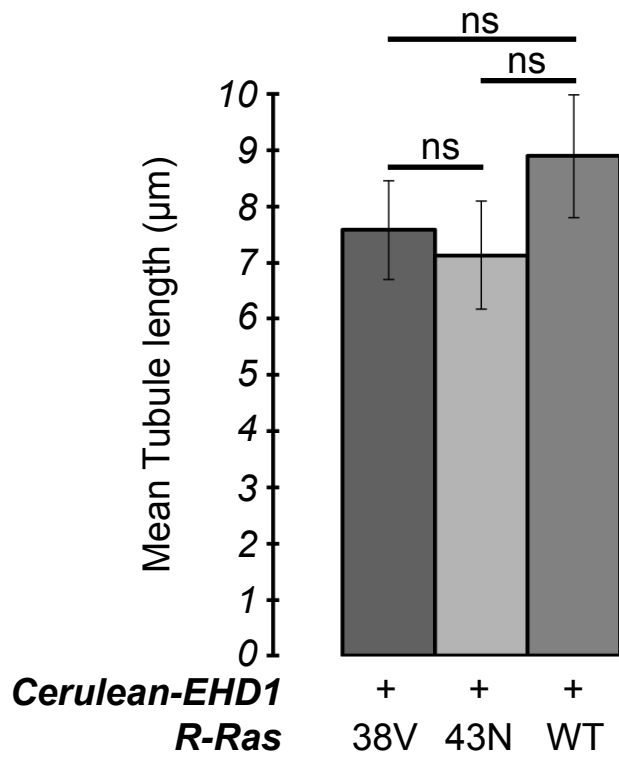

**Supplemental Figure 2: R-Ras does not affect EHD1 tubule length.** The longest EHD1 endosome per cell was measured in cells expressing Cerulean-EHD1 and mcherry tagged versions of mutant R-Ras (38V or 43N) or WT R-Ras (Figure 2). Samples were analyzed using a 2-sample t-test using MiniTab 17. ns = not significant.

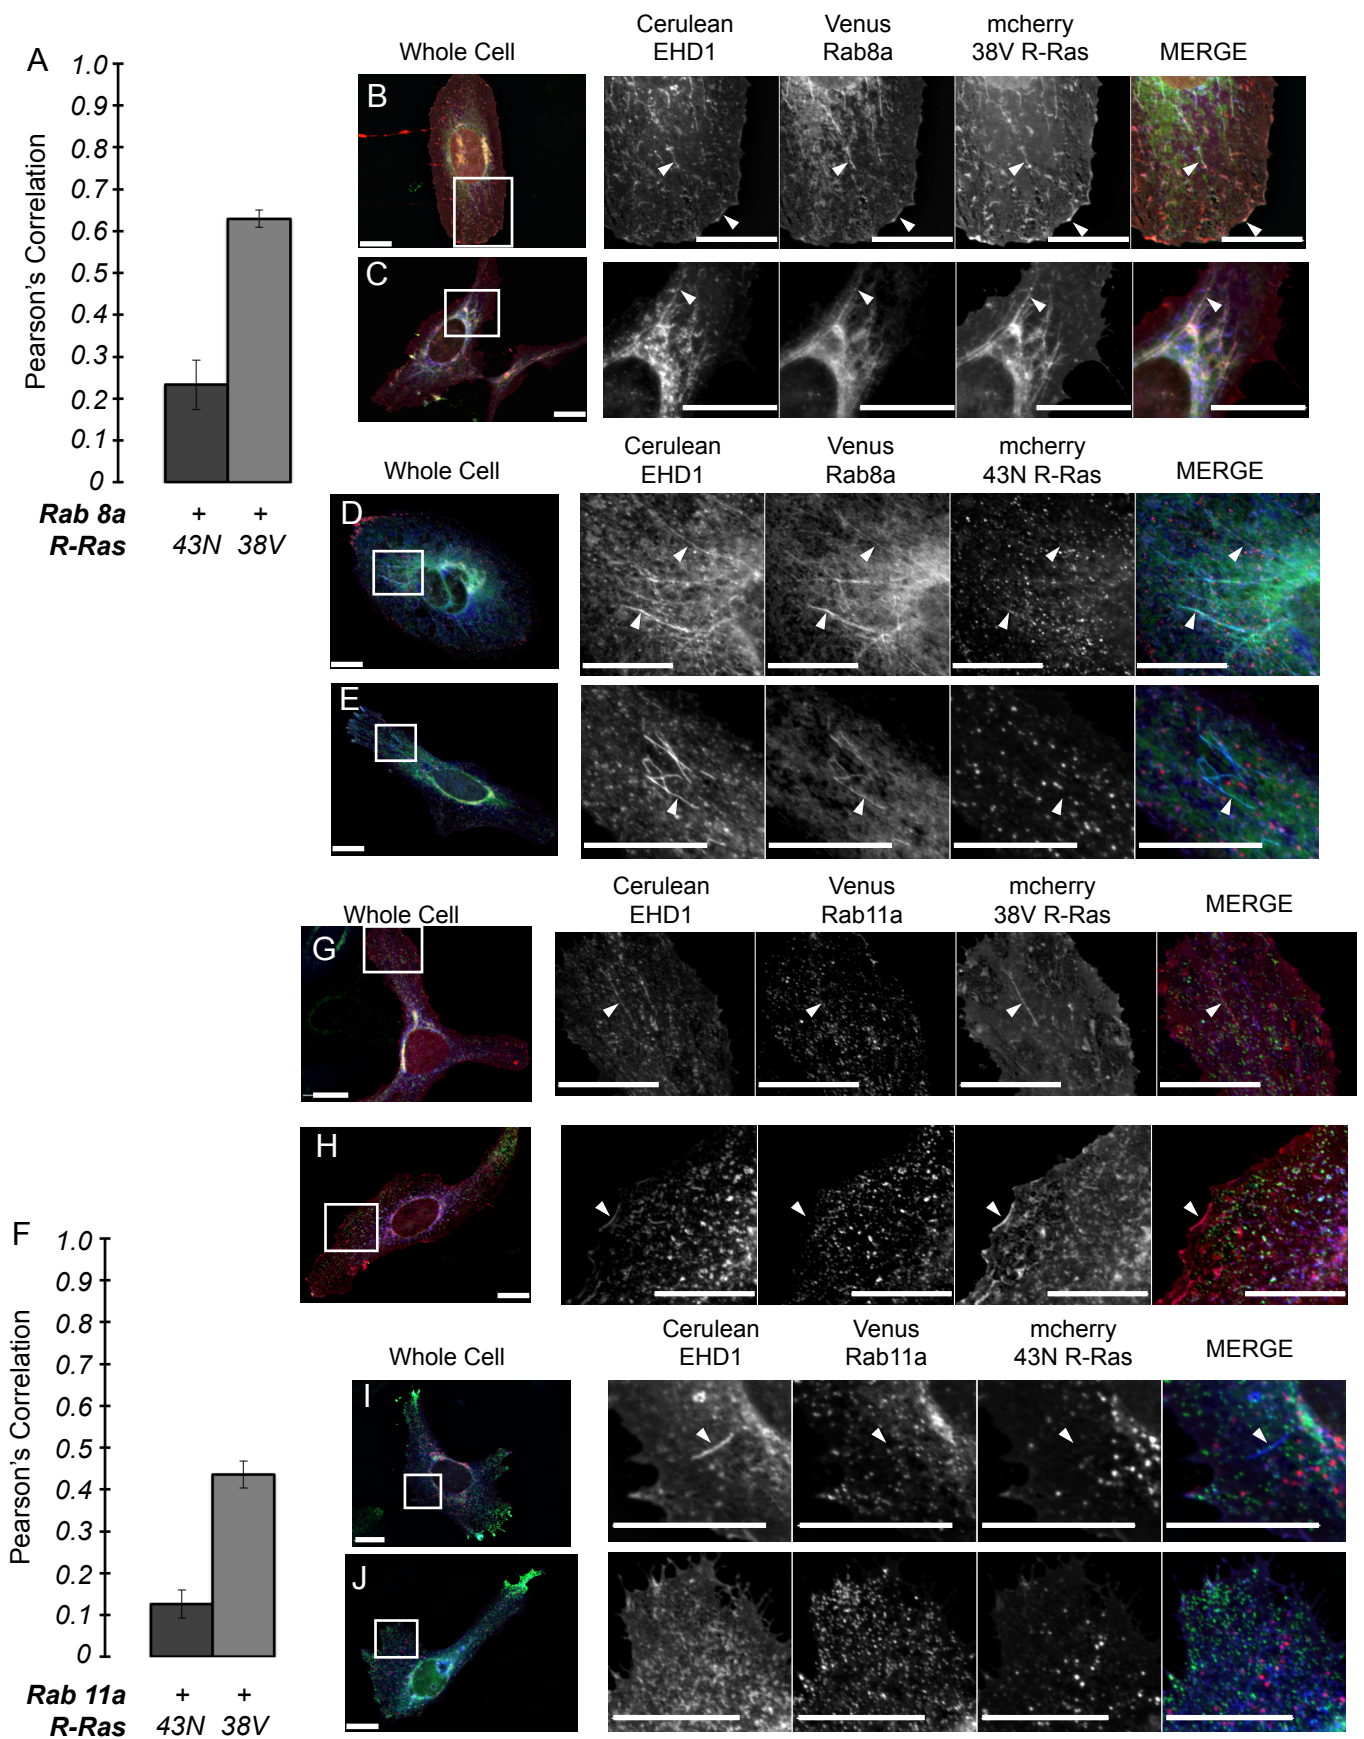

**Supplemental Figure 3: 38V R-Ras shows higher co-localization with Rab8a than Rab11a.** R-Ras channels were masked, and the Pearson's Correlation coefficients were exported from Slidebook 6.0. Rab8a showed co-localization with 38V R-Ras (Pearson's = 0.63) at tubular EHD1 endosomes and at the peripheral plasma membrane (see white arrows). Rab11a and 38V R-Ras showed partial co-localization (Pearson's = 0.44) but, Rab11a was noticeably absent from the plasma membrane and EHD1 tubular endosomes in most cells. 43N R-Ras did not co-localize with either Rab8a (Pearson's = 0.21) or Rab11a (Pearson's = 0.11). EHD1 is pseudocolored blue, Rabs are green, and R-Ras is red.

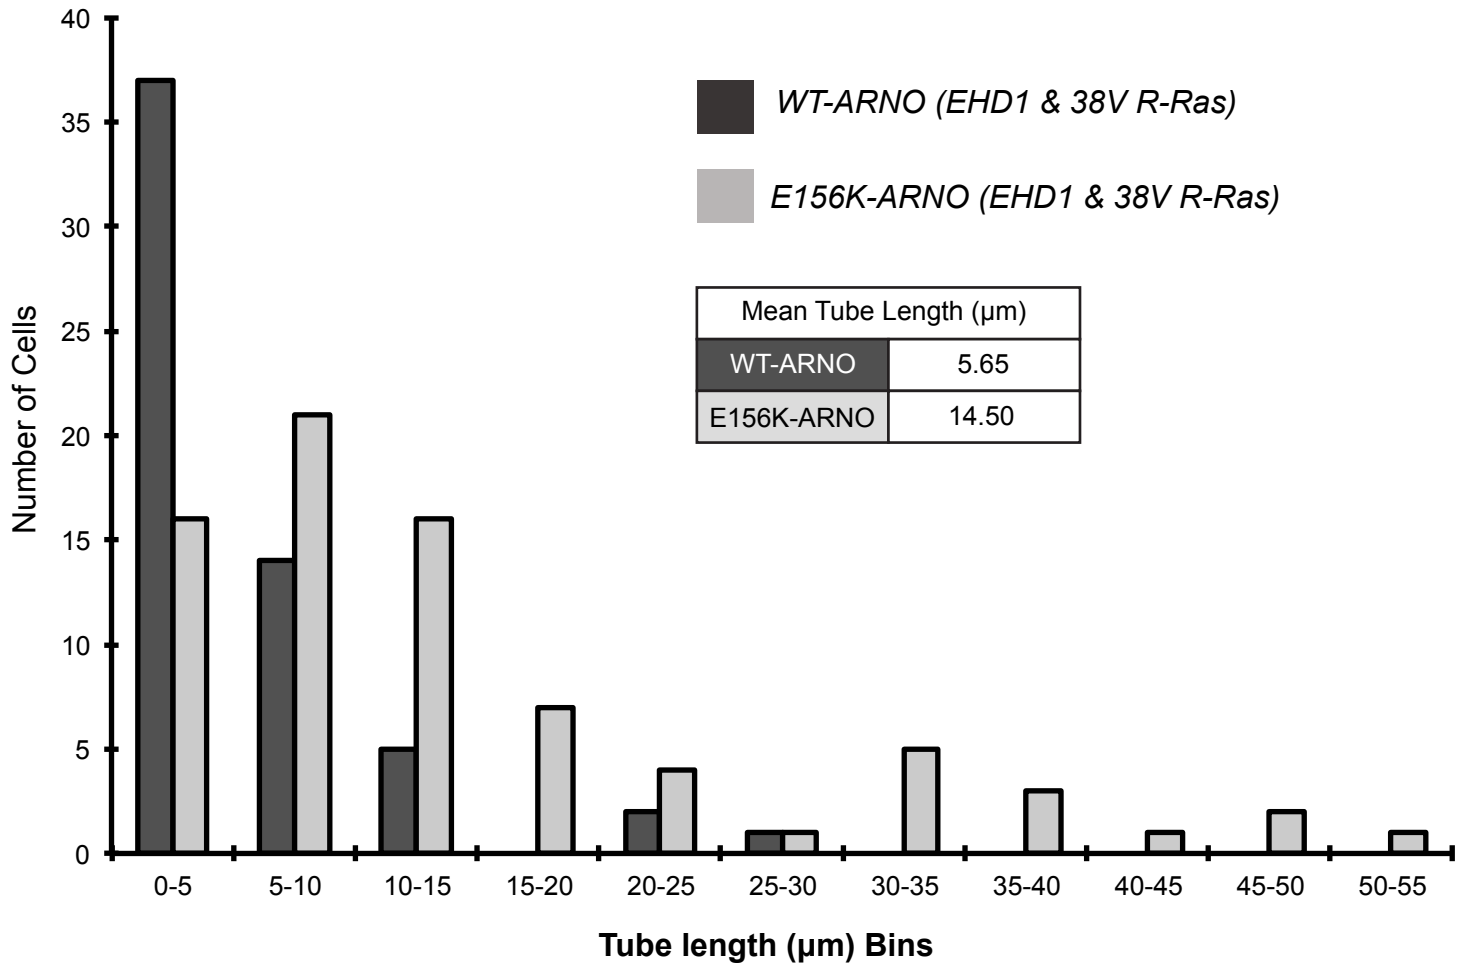

**Supplemental Figure 4: Distribution of tubule length in cells expressing WT-ARNO vs. E156K-ARNO.** The longest tubule in each cell from the experiment presented in Figure 3 was measured using Slidebook 6.0 software. Cells with E156K-ARNO have an average tube length (mean = 14.50 µm) about 2.5 times longer than WT-ARNO cells (mean = 5.646 µm). Measurements were obtained from a total of 136 cells.

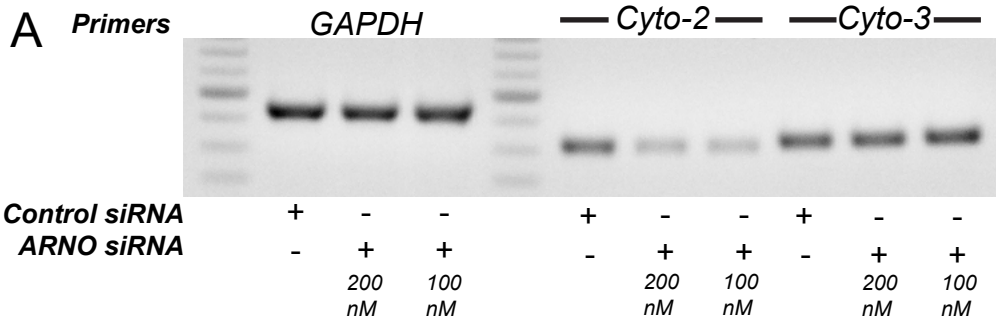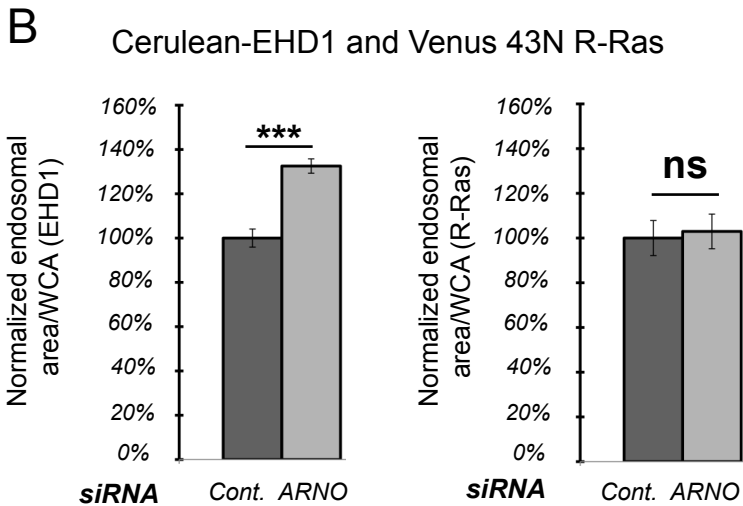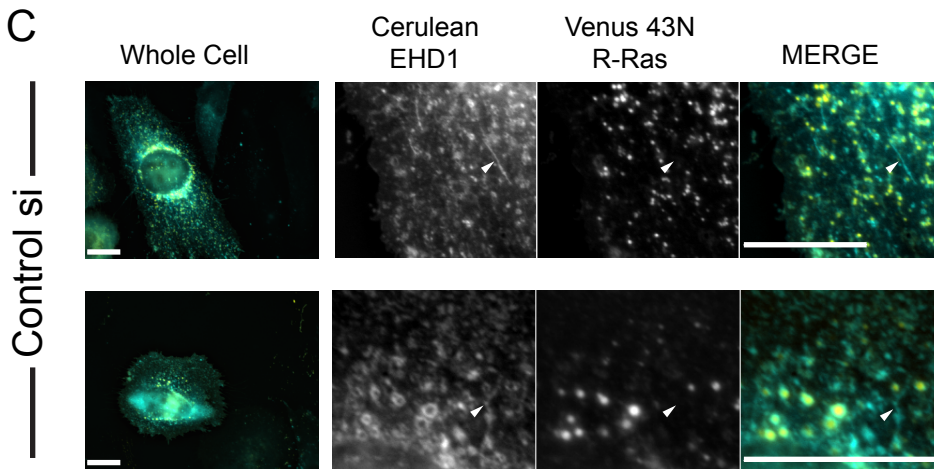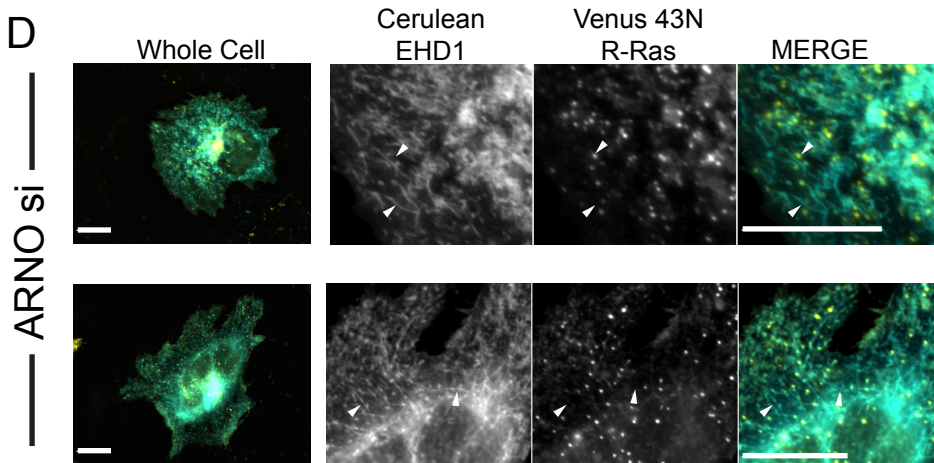

**Supplemental Figure 5: Cytohesin-2/ARNO knockdown does not change intracellular accumulation of 43N R-Ras.** (A) One Step RT-PCR (Qiagen) using GAPDH primers as a control, primers targeting the PH-domain of human cytohesin-2/ARNO, and cytohesin-3/GRP1. Two ARNO knockdowns using 200 nM and 100 nM siRNA were performed. Band intensity of gel images were analyzed in ImageJ. A ~75% knockdown of ARNO was achieved for both knockdowns. (B) Cytohesin-2/ARNO knockdown promotes intracellular accumulation of EHD1 but not 43N R-Ras. (C) Control siRNA treated cells show EHD1 tubular endosomes devoid of 43N R-Ras, but maintain EHD1-doughnut shaped structures filled with R-Ras. (D) While ARNO siRNA treated cells show highly tubular endosomes and intracellular levels of EHD1, 43N R-Ras morphology is unchanged. EHD1 is pseudocolored cyan and R-Ras is yellow. The following number of cells from one experiment were analyzed: (EHD1/43N R-Ras control and ARNOsi; n = 118 cells). \*\*\*p < 0.001, ns = not significant. Scale bars = 20  $\mu$ m.

| Supplemental Table 3A: Percentage of EHD1 Objects (endosomes) within a given range |             |               |                |                  |                 |                   |                 |                   |
|------------------------------------------------------------------------------------|-------------|---------------|----------------|------------------|-----------------|-------------------|-----------------|-------------------|
| PERIMETER                                                                          | EHD1 (Cont) | EHD1 (ARNOSi) | EHD1/WT (Cont) | EHD1/WT (ARNOSi) | EHD1/38V (Cont) | EHD1/38V (ARNOSi) | EHD1/43N (Cont) | EHD1/43N (ARNOSi) |
| % < 5 $\mu\text{m}$                                                                | 28.64%      | 28.80%        | 25.74%         | 25.40%           | 34.78%          | 26.97%            | 32.25%          | 28.19%            |
| % 5-10 $\mu\text{m}$                                                               | 49.37%      | 46.01%        | 47.18%         | 45.78%           | 49.52%          | 50.11%            | 49.92%          | 48.65%            |
| % >10 $\mu\text{m}$                                                                | 21.99%      | 25.20%        | 27.08%         | 28.82%           | 15.70%          | 22.92%            | 17.83%          | 23.16%            |
|                                                                                    |             |               |                |                  |                 |                   |                 |                   |
| MAJOR AXIS LENGTH                                                                  | EHD1 (Cont) | EHD1 (ARNOSi) | EHD1/WT (Cont) | EHD1/WT (ARNOSi) | EHD1/38V (Cont) | EHD1/38V (ARNOSi) | EHD1/43N (Cont) | EHD1/43N (ARNOSi) |
| % < 2 $\mu\text{m}$                                                                | 9.20%       | 12.22%        | 8.45%          | 8.55%            | 10.40%          | 6.83%             | 9.69%           | 7.68%             |
| % 2-4 $\mu\text{m}$                                                                | 40.43%      | 36.86%        | 39.42%         | 38.03%           | 45.92%          | 38.92%            | 43.83%          | 40.93%            |
| % 4-6 $\mu\text{m}$                                                                | 24.94%      | 23.70%        | 24.16%         | 23.68%           | 24.03%          | 26.58%            | 24.58%          | 24.88%            |
| % 6-8 $\mu\text{m}$                                                                | 11.99%      | 11.46%        | 11.70%         | 11.62%           | 9.46%           | 12.04%            | 10.90%          | 11.85%            |
| % > 8 $\mu\text{m}$                                                                | 13.44%      | 15.76%        | 16.27%         | 18.12%           | 10.19%          | 15.64%            | 11.00%          | 14.66%            |

| Supplemental Table 3B: Mean Morphometry Values ( $\mu\text{m}$ ) |             |               |                |                  |                 |                   |                 |                   |
|------------------------------------------------------------------|-------------|---------------|----------------|------------------|-----------------|-------------------|-----------------|-------------------|
|                                                                  | EHD1 (Cont) | EHD1 (ARNOSi) | EHD1/WT (Cont) | EHD1/WT (ARNOSi) | EHD1/38V (Cont) | EHD1/38V (ARNOSi) | EHD1/43N (Cont) | EHD1/43N (ARNOSi) |
| Mean PERIMETER ( $\mu\text{m}$ )                                 | 8.58        | 9.57          | 9.83           | 10.33            | 7.50            | 8.96              | 7.72            | 8.76              |
| Mean MAJOR AXIS LENGTH ( $\mu\text{m}$ )                         | 1.76        | 1.81          | 1.85           | 1.91             | 1.64            | 1.84              | 1.68            | 1.80              |

**Supplemental Table 3: Cytohesin-2/ARNO knockdown results in more EHD1 endosomes with large perimeter and major axis length.** (A) EHD1 2D-Laplacian filter masks were exported as individual objects from Slidebook 6.0 in control and ARNOSi cells. Objects within a given range were counted and calculated as the percentage of total objects. (B) Raw perimeter ( $\mu\text{m}$ ) and major axis length ( $\mu\text{m}$ ) values were averaged. Green boxes highlight increases in ARNO siRNA treated cells.



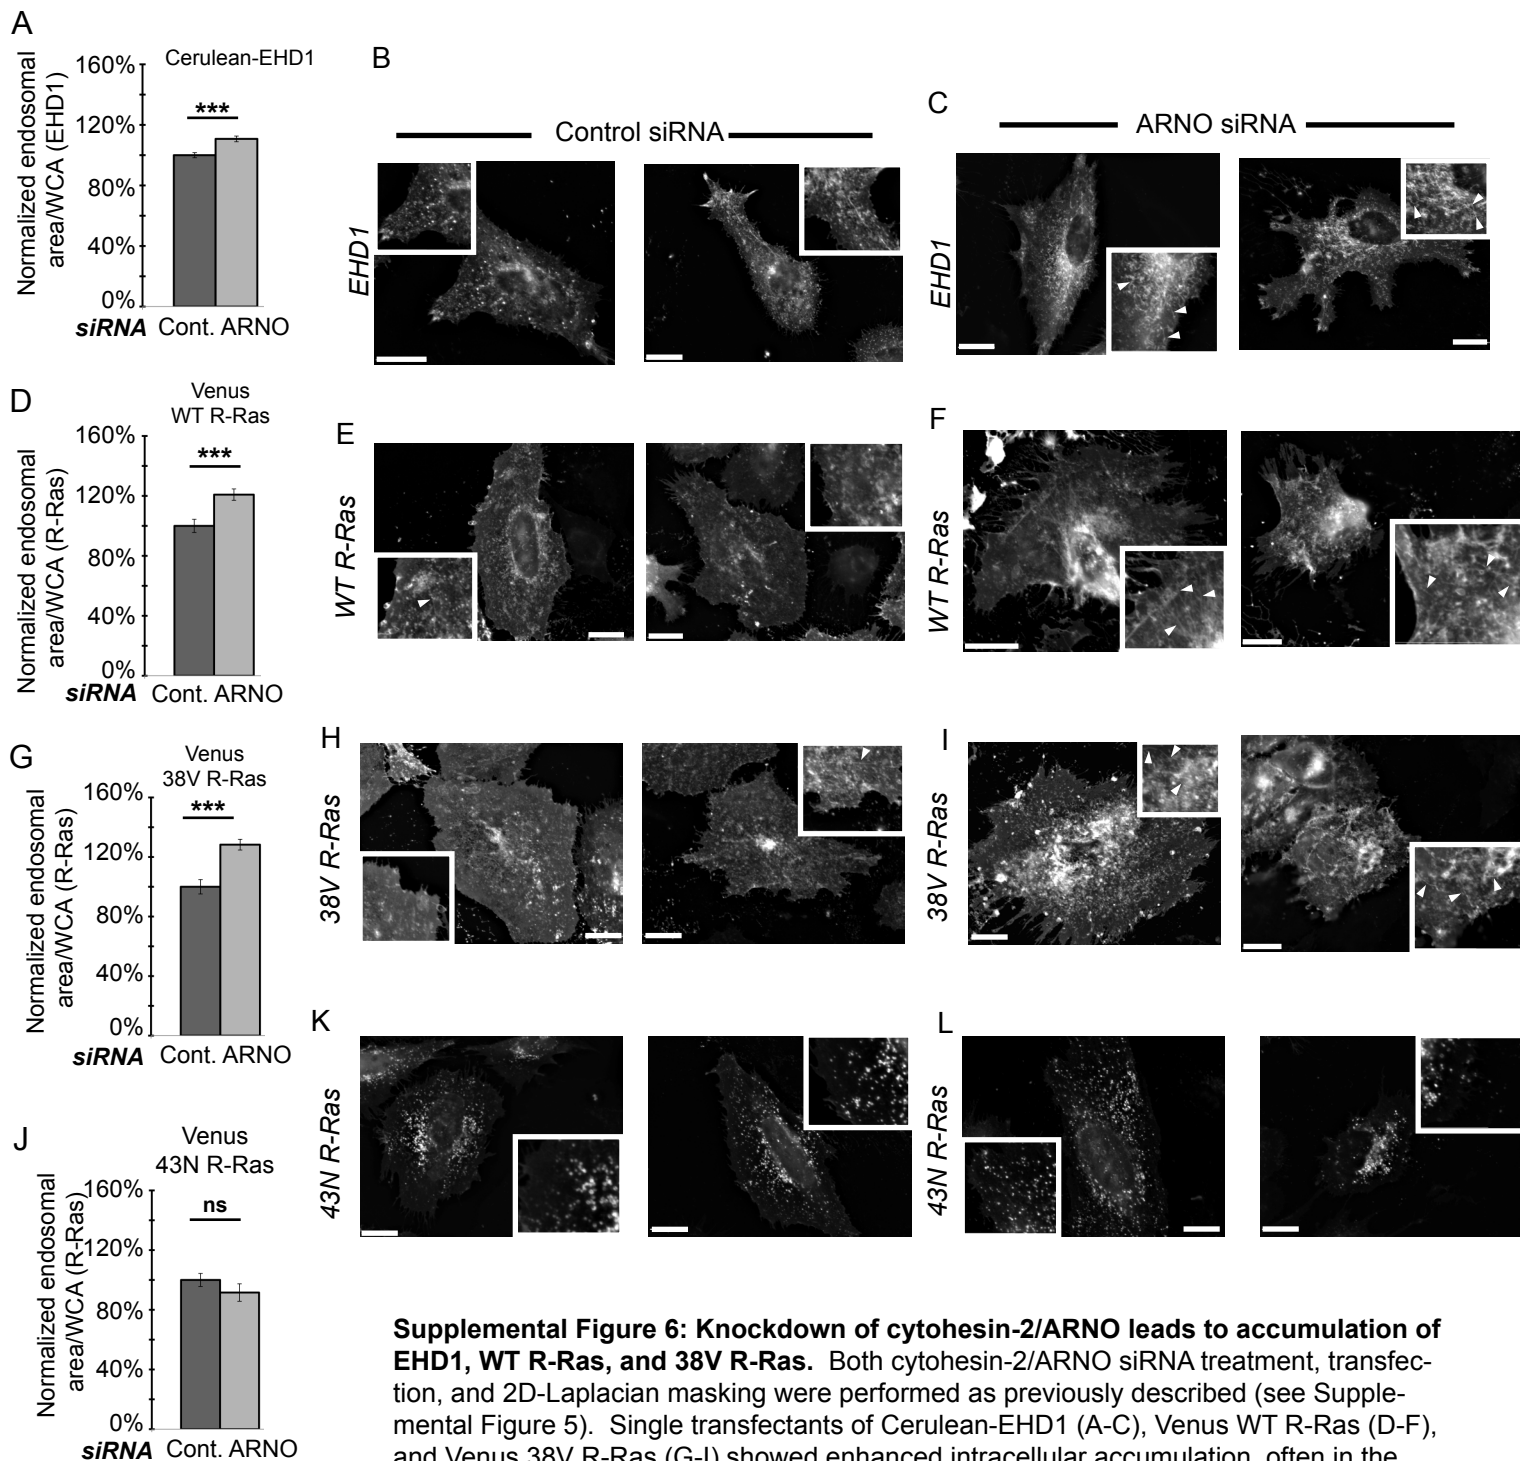

**Supplemental Figure 6: Knockdown of cytohesin-2/ARNO leads to accumulation of EHD1, WT R-Ras, and 38V R-Ras.** Both cytohesin-2/ARNO siRNA treatment, transfection, and 2D-Laplacian masking were performed as previously described (see Supplemental Figure 5). Single transfectants of Cerulean-EHD1 (A-C), Venus WT R-Ras (D-F), and Venus 38V R-Ras (G-I) showed enhanced intracellular accumulation, often in the form of more tubule formation in cells where cytohesin-2/ARNO levels were reduced (white arrows). Venus 43N R-Ras (J-L) did not show any tube formation or change in accumulation. The following number of cells from one experiment were analyzed: (EHD1; n = 239 cells, WT R-Ras; n = 176 cells, 38V R-Ras; n = 106 cells, 43N R-Ras; 106 cells). \*\*\*p < 0.001, ns = not significant. Scale bars = 20  $\mu$ m.

A

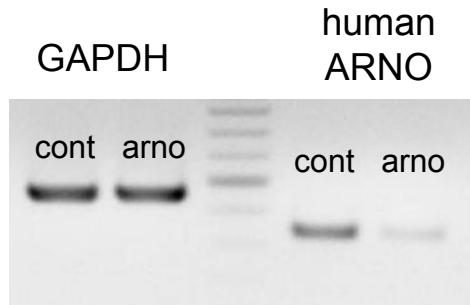

B

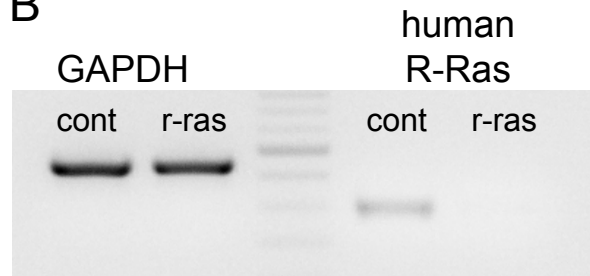

**Supplemental Figure 7:** One Step RT-PCR (Qiagen) using GAPDH primers as a control, and primers targeting the PH-domain of human cytohesin-2/ARNO (A) or R-Ras (B). Universal control siRNA was used as a control. Band intensity of gel images were analyzed in ImageJ. A 80% knockdown of ARNO was achieved and over 90% of R-Ras knockdown was achieved for cells that were analyzed for cell spreading (B).
